# Supplementary material for: NASICON-Structured NaTi2(PO4)3 for Sustainable Energy Storage
Source: PubMed Central journal article supplement (PMC7770786; doi:10.1007/s40820-019-0273-1), 2019-05-25
Supplement: 40820_2019_273_MOESM1_ESM.pdf [file 40820_2019_273_MOESM1_ESM.pdf]

Supporting Information for

**NASICON-Structured  $\text{NaTi}_2(\text{PO}_4)_3$  for Sustainable Energy Storage**

Mingguang Wu<sup>1</sup>, Wei Ni<sup>2,3,\*</sup>, Jin Hu<sup>1,\*</sup>, Jianmin Ma<sup>1,4,\*</sup>

<sup>1</sup>School of Physics and Electronics, Hunan University, Changsha 410082, People's Republic of China

<sup>2</sup>Faculty of Technology, University of Oulu, Oulu 90014, Finland

<sup>3</sup>Panzhuhua University, Panzhuhua 617000, People's Republic of China

<sup>4</sup>Key Laboratory of Materials Processing and Mold (Zhengzhou University), Ministry of Education, Zhengzhou University, Zhengzhou 450002, People's Republic of China

\*Corresponding authors. E-mail: wei.ni@oulu.fi (W. Ni); hujin@hnu.edu.cn (J. Hu); nanoelechem@hnu.edu.cn (J. Ma)

**Table S1** Summary of the Na-storage performance of typical  $\text{NaTi}_2(\text{PO}_4)_3$  in organic electrolytes. The theoretical capacity of  $\text{NaTi}_2(\text{PO}_4)_3$  (NTP) as SIB anode is  $133 \text{ mAh g}^{-1}$  [S1]. EC: ethylene carbonate, DEC: diethyl carbonate, DMC: diethyl carbonate, PC: propylene carbonate; FEC: fluoroethylene carbonate.  $1\text{C} = 133 \text{ mA g}^{-1}$  [S2]. The value of rate C may vary in some references

| Type of materials                                                                                                      | Methods/Electrolytes                                                            | Current density ( $\text{mA g}^{-1}$ ) | Cycle number              | Cut-off voltage (V) | Specific capacity ( $\text{mAh g}^{-1}$ ) | CE (%)           | ICE (%) | Initial capacity Discharge/Charge               | Rate capacity (Current density) ( $\text{mAh g}^{-1}$ )                           | Mass loading ( $\text{mg cm}^{-2}$ )  | Year/Refs. |
|------------------------------------------------------------------------------------------------------------------------|---------------------------------------------------------------------------------|----------------------------------------|---------------------------|---------------------|-------------------------------------------|------------------|---------|-------------------------------------------------|-----------------------------------------------------------------------------------|---------------------------------------|------------|
| <b>Porous <math>\text{NaTi}_2(\text{PO}_4)_3</math> nanocubes</b>                                                      | one-pot solvothermal<br>1 M $\text{NaClO}_4$ in EC/DMC (2% FEC)                 | 10C                                    | 10000                     | 1.5-2.8             | 87                                        | 99.96            |         |                                                 | 110 (0.2C)<br>107 (0.5C)<br>106 (1C)<br>105 (2C)<br>104 (5C)                      | 2.8-3.5<br>(1.6-2.1, active material) | 2015/[S3]  |
| <b>NTP-C (acetylene black) [NTP-C/<math>\text{Na}_2\text{FeP}_2\text{O}_7</math>]</b>                                  | ball-milling, carbothermal treatment<br>1 M $\text{NaClO}_4$ in PC              | $2 \text{ mA cm}^{-2}$                 | 30                        | 0-1.4               | [47]                                      |                  | [95]    | [50/47]                                         |                                                                                   |                                       | 2016/[S4]  |
| <b>Carbon-coated <math>\text{NaTi}_2(\text{PO}_4)_3</math> composite (NTP@C)</b>                                       | evaporation, annealing<br>1 M $\text{NaClO}_4$ in EC/DMC                        | 0.2C/5C                                | 20                        | 1.0-3.0             | 111/86                                    |                  |         | 113@0.2C                                        | 109 (0.5C)<br>105 (1C)<br>99 (2C)<br>87 (5C)                                      |                                       | 2018/[S5]  |
| <b>Porous <math>\text{NaTi}_2(\text{PO}_4)_3</math> nanoparticles coated with thin carbon layer (mesoporous NTP@C)</b> | hydrothermal, PDA coating, annealing                                            | 1C/10C                                 | 500/200<br>0              | 1.5-3.0             | 78/61                                     |                  | 87.5    | 96/84@1C                                        | 109 (0.2C)<br>102 (0.5C)<br>98 (1C)<br>92 (2C)<br>84 (5C)<br>73 (10C)<br>55 (20C) |                                       | 2018/[S6]  |
| <b><math>\text{NaTi}_2(\text{PO}_4)_3</math>/N-doped C composite</b>                                                   |                                                                                 | 10C (0.2C)                             | 200 (30)                  | 1.5-3.2             | 76 (126)                                  |                  |         | 82@10C                                          | 124 (0.5C)<br>119 (1C)<br>113 (2C)<br>105 (4C)<br>95 (6C)                         |                                       | 2018/[S7]  |
| <b><math>\text{NaTi}_2(\text{PO}_4)_3</math>/C porous plates</b>                                                       | solvothermal, in-situ carbon coating, calcination<br>1 M $\text{NaClO}_4$ in PC | 10C (1/2/5C)                           | 120                       | 1.5-3.3             | 70 (105/100/82)                           | 99 (~100 @1C/2C) |         | 125@0.1C<br>110@1C<br>106@2C<br>95@5C<br>85@10C |                                                                                   | 2.3-2.9                               | 2016/[S8]  |
| <b><math>\text{NaTi}_2(\text{PO}_4)_3</math> nanoparticles embedded in interconnected nanocarbon networks (NTP/C)</b>  | soft-template (CTAB), calcination<br>1 M $\text{NaClO}_4$ in EC/DMC             | 50C (1C/5C/10C/20C)                    | 6000 (800/2000/3000/1000) | 1.5-2.8             | 83 (119/~113/118/118)                     | ~100 (~100 @5C)  | ~98 @1C | 132@iC<br>126@5C<br>122@10C                     | 132 (1C)<br>125 (5C)<br>124 (10C)<br>123 (20C)<br>120 (40C)<br>114 (60C)          | ~0.6                                  | 2016/[S9]  |

## Nano-Micro Letters

|                                                                                                                                                                                                    |                                                                                                     |            |             |           |              |        |                                                                |                                                                                  |         |            |
|----------------------------------------------------------------------------------------------------------------------------------------------------------------------------------------------------|-----------------------------------------------------------------------------------------------------|------------|-------------|-----------|--------------|--------|----------------------------------------------------------------|----------------------------------------------------------------------------------|---------|------------|
|                                                                                                                                                                                                    |                                                                                                     |            |             |           |              |        |                                                                | 109 (80C)<br>108 (100C)                                                          |         |            |
| <b>Nanostructured NaTi<sub>2</sub>(PO<sub>4</sub>)<sub>3</sub>/C</b>                                                                                                                               | pyro-synthesis, annealing<br>1 M NaClO <sub>4</sub> in EC/DEC (3% FEC)                              | 5C (0.5C)  | 250 (70)    | 0.01-2.8  | ~150 (179)   | ~100   | 316@0.5C                                                       | 225 (0.2C)<br>181 (5C)                                                           |         | 2016/[S10] |
| <b>NTP@C nanocomposite</b>                                                                                                                                                                         | sol-gel, grinding, sintering<br>1 M NaClO <sub>4</sub> in EC/PC                                     | 20C        | 10000       | 0.01-3.0  | 56           | 48     | 455                                                            | 170 (1C)<br>115 (10C)<br>66 (50C)<br>50 (100C)                                   | 1.6-2.4 | 2016/[S11] |
| <b>NTP/C [full cell with ternary-metal PBAs cathode]</b>                                                                                                                                           | hydrothermal, heating (glucose-derived C)<br>1 M NaClO <sub>4</sub> in EC/DEC (2% FEC)              | [150]      | [300]       | [0.5-2.2] | [~110]       | [~100] | [78.2 ]<br>[161/126@15 mA g <sup>-1</sup> ]<br>[based on PBAs] | [90@750<br>60@1500 mA g <sup>-1</sup> ]                                          |         | 2018/[S12] |
| <b>NTP/C nanocomposites</b><br>(NPs size 20-40 nm, C shell thickness ~4nm, C content 3.82%)<br>[full cell NTP/C-U//Na <sub>3</sub> V <sub>2</sub> (PO <sub>4</sub> ) <sub>2</sub> F <sub>3</sub> ] | solvothermal, in-situ carbon coating (calcination)<br>1 M NaClO <sub>4</sub> in DMC/EC/EMC (5% FEC) | 1C/3C [1C] | 1500 [200]  | 1.5-3.0   | 97/~97 [-92] |        | 107                                                            | 109@0.5C<br>92@20C<br>86@30C<br>66@50C<br>[111@0.5C<br>93@10C<br>69@20C]         | ~1.5    | 2018/[S13] |
| <b>NaTi<sub>2</sub>(PO<sub>4</sub>)<sub>3</sub> nanoparticles</b>                                                                                                                                  | polyol-assisted pyro-synthesis, annealing<br>1 M NaClO <sub>4</sub> in EC/DEC (3% FEC)              | 0.1C       | 30          | 1.2-2.8   | 208          |        |                                                                | 110 (0.2C)<br>98 (0.5C)<br>86 (1C)<br>79 (2C)<br>65 (5C)<br>56 (10C)<br>42 (20C) |         | 2016/[S14] |
| <b>3D NaTi<sub>2</sub>(PO<sub>4</sub>)<sub>3</sub>@C microspheres</b>                                                                                                                              | spray-drying, calcination<br>1 M NaClO <sub>4</sub> in EC/DMC                                       | 10C (0.1C) | 500 (30)    | 1.5-2.8   | 97 (124)     |        | 127@0.1C                                                       | 124 (0.5C)<br>120 (1C)<br>116 (2C)<br>107 (5C)                                   | 2.6     | 2018/[S15] |
| <b>Open holey-structured NaTi<sub>2</sub>(PO<sub>4</sub>)<sub>3</sub>/C nanocomposite</b>                                                                                                          | solvothermal, annealing<br>1 M NaClO <sub>4</sub> in EC/DMC                                         | 50C (0.5C) | 10000 (200) | 1.5-3.0   | 103 (123)    |        | 129@0.5C                                                       | 124 (0.5C)<br>120 (50C)                                                          |         | 2018/[S16] |
| <b>Nanosized porous carbon-coated NaTi<sub>2</sub>(PO<sub>4</sub>)<sub>3</sub> particles</b>                                                                                                       | hydrothermal, annealing                                                                             | 10C (0.5C) | 1000 (350)  | 1.5-3.0   | 106 (108)    | 95.2   | /115@0.1C<br>/115@0.5C                                         | 114 (0.5/1/2C)<br>113 (5/10C)<br>112 (20C)<br>111@30C                            | 1.35    | 2018/[S17] |

## Nano-Micro Letters

|                                                                                                                                 |                                                                                              |        |                |         |         |              |    |                    |                                                                                                              |          |            |
|---------------------------------------------------------------------------------------------------------------------------------|----------------------------------------------------------------------------------------------|--------|----------------|---------|---------|--------------|----|--------------------|--------------------------------------------------------------------------------------------------------------|----------|------------|
| <b>(mesoporous NTP@C nanocubes)</b>                                                                                             | 1 M NaClO <sub>4</sub> in EC/DMC (1% FEC)                                                    |        |                |         |         |              |    |                    | [-20°C: 98@10C<br>61@20C]                                                                                    |          |            |
| <b>NaTi<sub>2</sub>(PO<sub>4</sub>)<sub>3</sub>/C composite nanofibers</b>                                                      | electrospinning, calcination<br>1 M NaClO <sub>4</sub> in EC/PC (5% FEC)                     | 5C     | 500            | 15-3.3  | 97      | ~100         |    | 129@0.1C<br>105@5C | 130 (0.1C)<br>123 (0.2C)<br>122 (0.5C)<br>119 (1C)<br>114 (2C)<br>103 (5C)<br>87 (10C)<br>63 (20C)           | ~1.7     | 2017/[S18] |
| <b>Porous NaTi<sub>2</sub>(PO<sub>4</sub>)<sub>3</sub>/C hierarchical nanofibers [full cell NTP/CNFs//NiHCF]</b>                | electrospinning, annealing<br>1 M NaClO <sub>4</sub> in EC/DEC (2% FEC)                      | 2C     | 700            | 1.5-3.0 | ~110    | ~100         |    |                    | 120 (0.2C)<br>118 (1C/2C)<br>111 (5C)<br>98 (10C)<br>71 (20C)                                                |          | 2018/[S19] |
| <b>Ultrafine NaTi<sub>2</sub>(PO<sub>4</sub>)<sub>3</sub> NPs encapsulated in N-doped CNFs (NTP-NCNFs)</b>                      | electrospinning, calcination<br>1 M NaClO <sub>4</sub> in EC/PC                              | 10C    | 2000/20<br>000 | 0-3.0   | 121/105 |              |    |                    | 176 (0.1C)<br>163 (0.2C)<br>149 (0.5C)<br>138 (1C)<br>127 (2C)<br>110 (5C)<br>95 (10C)<br>71 (20C)           | 0.64     | 2018/[S20] |
| <b>NaTi<sub>2</sub>(PO<sub>4</sub>)<sub>3</sub>/C nanocomposite (NPT/C-CNTs)</b>                                                | solvothermal, hydrothermal, annealing<br>1 M NaClO <sub>4</sub> in EC/PC                     | 1C/50C | 200/100<br>0   | 1.5-3.0 | 109/94  | ~100@<br>50C |    | 112@1C<br>96@50C   | 117 (1C)<br>113 (10C)<br>103 (50C)<br>[0.5C, 118@0°C,<br>117@-10°C,<br>113@-20°C]<br>[65 (10C) at -<br>20°C] | ~2       | 2016/[S21] |
| <b>Hierarchical porous nanocomposite of MWCNT-threaded mesoporous NaTi<sub>2</sub>(PO<sub>4</sub>)<sub>3</sub> nanocrystals</b> | hydrothermal, calcination, hetero-assembly, freeze-drying<br>1 M NaClO <sub>4</sub> in EC/PC | 1C/10C | 200/200<br>0   | 1.5-3.0 | 106/74  | 99           | 99 | 121/120@1C         | 102 (0.5C)<br>95 (2C)<br>90 (5C)<br>84 (20C)<br>82 (30C)<br>74 (50C)                                         | 0.9-1.76 | 2016/[S22] |
| <b>3D NaTi<sub>2</sub>(PO<sub>4</sub>)<sub>3</sub>@CNT microspheres</b>                                                         | spray-drying, calcination<br>1 M NaClO <sub>4</sub> in EC/DEC                                | 10C    | 20             | 1.5-3.0 | 88      |              |    | 127@0.1C           | 125 (0.2C)<br>123 (0.5C)<br>120 (1C)<br>116 (2C)<br>111 (4C)<br>105 (6C)                                     | 1.9      | 2017/[S23] |

## Nano-Micro Letters

|                                                                                                                   |                                                                                                 |                   |                             |          |                         |              |                   |                               |                                                                                                |      |            |
|-------------------------------------------------------------------------------------------------------------------|-------------------------------------------------------------------------------------------------|-------------------|-----------------------------|----------|-------------------------|--------------|-------------------|-------------------------------|------------------------------------------------------------------------------------------------|------|------------|
|                                                                                                                   |                                                                                                 |                   |                             |          |                         |              |                   |                               | 97 (8C)                                                                                        |      |            |
|                                                                                                                   |                                                                                                 |                   |                             |          |                         |              |                   |                               | 88 (10C)                                                                                       |      |            |
| <b>Porous NaTi<sub>2</sub>(PO<sub>4</sub>)<sub>3</sub> nanocubes anchored on porous carbon nanosheets</b>         | calcination<br>1 M NaClO <sub>4</sub> in<br>EC/DEC (5%<br>FEC)                                  | 100/4000          | 100/200<br>0                | 0.01-3.0 | 172/98                  |              | 46.8              | 485/227                       | 280 (20)<br>164 (200)                                                                          |      | 2018/[S24] |
| <b>Mesoporous NaTi<sub>2</sub>(PO<sub>4</sub>)<sub>3</sub>/CMK-3 nanohybrid</b>                                   | solvothermal,<br>calcination<br>1 M NaClO <sub>4</sub> in<br>EC/PC                              | 0.5C              | 1000                        | 1.0-3.0  | 63                      | ~100         | 98                | 102/100@0.2C                  | 101 (0.2C)<br>76 (0.5C)<br>58 (1C)<br>39 (2C)                                                  | ~2   | 2014/[S25] |
| <b>1D mesoporous NaTi<sub>2</sub>(PO<sub>4</sub>)<sub>3</sub>/carbon nanofiber</b>                                | electrospinning,<br>two-step<br>calcination (Ar,<br>air)<br>1 M NaClO <sub>4</sub> in<br>EC/DEC | 0.5C/10C          | 20                          | 1.5-3.2  | 124/93                  |              | 99.2<br>@0.2<br>C | 127/126@0.2C                  | 127 (0.2C)<br>124 (0.5C)<br>121 (1C)<br>116 (2C)<br>105 (5C)<br>93 (10C)                       |      | 2018/[S26] |
| <b>Porous NaTi<sub>2</sub>(PO<sub>4</sub>)<sub>3</sub>@C nanocubes</b>                                            | hydrothermal,<br>annealing<br>1 M NaClO <sub>4</sub> in<br>EC/DMC (5%<br>FEC)                   | 100/1000          | 100/100<br>0                | 0.01-3.0 | 201/140                 |              |                   |                               | 225 (50)<br>203 (100)<br>190 (200)<br>166 (1000)<br>158 (2000)<br>149 (4000)<br>135 (8000)     |      | 2018/[S27] |
| <b>Carbon-coated NTP in porous carbon matrix (double carbon coating, NTP@C@PC)</b>                                | soft-chemical<br>method,<br>calcination<br>1 M NaClO <sub>4</sub> in<br>EC/DMC                  | 1C/5C/10C/20<br>C | 1000/50<br>00/6000/<br>9000 | 1.5-2.8  | 113/103/76/<br>70       | ~100@<br>20C | 95@<br>1C         | 133@0.5C<br>127@1C<br>110@10C | 121 (1C)<br>118 (2C)<br>116 (5C)<br>112 (10C)<br>104 (20C)<br>94 (30C)<br>64 (50C)             |      | 2015/[S28] |
| <b>Rutile TiO<sub>2</sub> and carbon coated NaTi<sub>2</sub>(PO<sub>4</sub>)<sub>3</sub> nanocubes (C/NTP-RT)</b> | hydrothermal,<br>vaporization,<br>annealing<br>1 M NaClO <sub>4</sub> in<br>EC/DMC              | 5C/10C            | 2000/10<br>000              | 1.2-2.8  | 78/72                   | 100          |                   |                               | 131 (0.1C)<br>113 (0.2C)<br>96 (0.5C)<br>92 (1C)<br>89 (2C)<br>86 (5C)<br>84 (10C)<br>77 (20C) | 2-3  | 2015/[S29] |
| <b>Carbon-coated hierarchical NaTi<sub>2</sub>(PO<sub>4</sub>)<sub>3</sub> mesoporous mcicroflowers</b>           | solvothermal,<br>annealing<br>1 M NaClO <sub>4</sub> in<br>EC/DEC (5%<br>FEC)                   | 20C<br>(1/5/10C)  | 10000<br>(200/500<br>/3000) | 1.5-3.0  | 85<br>(117/110/10<br>1) | ~100@<br>10C |                   | 125@1C<br>116@5C<br>114@10C   | 124 (1C)<br>120 (2C)<br>115 (5C)<br>111 (10C)<br>107 (20C)                                     | ~1.8 | 2016/[S30] |

## Nano-Micro Letters

|                                                                                                                                                                       |                                                                                                 |                         |              |                              |                     |       |           |                             |                                                                                                     |         |            |
|-----------------------------------------------------------------------------------------------------------------------------------------------------------------------|-------------------------------------------------------------------------------------------------|-------------------------|--------------|------------------------------|---------------------|-------|-----------|-----------------------------|-----------------------------------------------------------------------------------------------------|---------|------------|
|                                                                                                                                                                       |                                                                                                 |                         |              |                              |                     |       |           |                             | 100 (50C)<br>95 (100C)                                                                              |         |            |
| <b>NTP/graphene composite</b>                                                                                                                                         | sol-gel, post heat-treatment<br>1 M NaClO <sub>4</sub> in EC/DEC                                | 100                     | 700          | 1.5-3.8                      | 102                 |       |           | 121                         |                                                                                                     | 2-4     | 2014/[S31] |
| <b>NTP/rGO nanocomposite (nanocrystalline, ~60 nm)</b>                                                                                                                | Pechini method, calcination<br>1 M NaClO <sub>4</sub> in PC (5% FEC)                            | (5 mV s <sup>-1</sup> ) | 1000         | 1.5-3.0                      | 82                  | >99   |           |                             |                                                                                                     | 0.5-1.0 | 2017/[S32] |
| <b>NTP@C nanoparticles embedded in 2D S-doped graphene sheets</b>                                                                                                     | sol-gel, sintering<br>1 M NaClO <sub>4</sub> in EC/PC                                           | 10C/20C (0.1C)          | 100/500 (40) | 1.5-3.0                      | 113/96 (129)        |       |           | 102@20C                     | 130 (0.1C)<br>129 (0.5C)<br>127 (1C)<br>125 (2C)<br>120 (5C)                                        | ~2.8    | 2018/[S33] |
| <b>Porous NaTi<sub>2</sub>(PO<sub>4</sub>)<sub>3</sub> nanoparticles@3D graphene networks</b>                                                                         | hydrothermal, annealing<br>1 M NaClO <sub>4</sub> in EC/DEC (5% FEC)                            | 1C/10C                  | 200/100<br>0 | 1.5-3.0                      | 101/77              | 98/99 | 79/9<br>0 | 138/109@1C<br>107/96@10C    | 117 (0.5C)<br>112 (1C)<br>105 (5C)<br>96 (10C)<br>85 (20C)<br>67 (50C)                              | ~1.5    | 2015/[S1]  |
| <b>NTP/rGO nanocomposite</b>                                                                                                                                          | microwave-assisted solvothermal, freeze-drying, calcination<br>1 M NaClO <sub>4</sub> in EC/DEC | 10C                     | 1000 (640)   | 1.5-3.0                      | ~111 (120 at 55 °C) | 99.8  |           | 129@0.1C (123@10C, 55 °C)   | 94 (50C)                                                                                            | 2-3     | 2016/[S34] |
| <b>3D NaTi<sub>2</sub>(PO<sub>4</sub>)<sub>3</sub>@graphene (NTP@rGO) microspheres [full cell NTP@rGO//Na<sub>3</sub>V<sub>2</sub>(PO<sub>4</sub>)<sub>3</sub>/C]</b> | spray-drying, calcination<br>1 M NaClO <sub>4</sub> in EC/DEC                                   | 20C [10C]               | 1000 [1000]  | 1.4-3.0 [0.4-2.0, full cell] | ~80 [~81]           | >99.5 | 98        | 130/128@0.2C [132/128@0.1C] | 130 (0.1C)<br>130 (1C)<br>124 (10C)<br>122 (20C)<br>103 (50C)<br>75 (100C)<br>38 (200C)<br>[88@50C] | 1.5     | 2016/[S2]  |
| <b>NaTi<sub>2</sub>(PO<sub>4</sub>)<sub>3</sub>/rGO composite (NPs: 20-30 nm)</b>                                                                                     | polyol-assisted pyro-synthesis, calcination<br>1 M NaClO <sub>4</sub> in PC                     | 20C                     | 1000         | 1.0-3.0                      | 62                  | 100   |           | 132@0.07C<br>91@20C         | 100 (2.3C)<br>95 (9.2C)<br>78 (36.8C)                                                               |         | 2016/[S35] |
| <b>NaTi<sub>2</sub>(PO<sub>4</sub>)<sub>3</sub>@N-rGO composite</b>                                                                                                   | calcination<br>1 M NaClO <sub>4</sub> in EC/DEC                                                 | 20C                     | 200          | 1.5-3.0                      | 74                  |       |           | 129@0.1C<br>84@20C          | 126 (0.5C)<br>123 (1C)<br>117 (2C)<br>108 (5C)                                                      |         | 2017/[S36] |

## Nano-Micro Letters

|                                                                                                                                                                |                                                                                                          |                      |                 |                                |                             |                |                                  |                                   |                                                                                                                                                                           |         |            |
|----------------------------------------------------------------------------------------------------------------------------------------------------------------|----------------------------------------------------------------------------------------------------------|----------------------|-----------------|--------------------------------|-----------------------------|----------------|----------------------------------|-----------------------------------|---------------------------------------------------------------------------------------------------------------------------------------------------------------------------|---------|------------|
|                                                                                                                                                                |                                                                                                          |                      |                 |                                |                             |                |                                  |                                   | 96 (10C)                                                                                                                                                                  |         |            |
| <b>Hollow NaTi<sub>2</sub>(PO<sub>4</sub>)<sub>3</sub> nanocubes/rGO</b>                                                                                       | hydrothermal, calcination<br>1 M NaClO <sub>4</sub> in EC/DEC                                            | 3/20C<br>(1/3/5/10C) | 500<br>(100)    | 1.2-2.8                        | 103/60<br>(124/118/104/100) | 99.8           |                                  | 128@1C                            | 128 (0.1C)<br>125 (1C)<br>118 (3C)<br>116 (5C)<br>106 (10C)<br>90 (20C)<br>63 (50C)                                                                                       | 1.5-1.8 | 2017/[S37] |
| <b>NaTi<sub>2</sub>(PO<sub>4</sub>)<sub>3</sub>/rGO microspheres [full cell with cathode Na<sub>3</sub>V<sub>2</sub>(PO<sub>4</sub>)<sub>3</sub>/rGO]</b>      | spray-drying, annealing<br>0.8 M NaClO <sub>4</sub> in TMP (trimethyl phosphate) (10% FEC)               | 0.5C<br>[10C]        | 1000<br>[1000]  | 1.4-3.0<br>[0.4-2.0 full cell] | 91<br>[56]                  | 99.5<br>[99.7] | [87.7<br>]                       | [104@0.2C]                        | 128 (0.2C)<br>123 (0.5C)<br>118 (1C)<br>112 (2C)<br>104 (5C)<br>96 (10C)<br>87 (20C)<br>81 (30C)<br>[100 (0.5C)<br>89 (1C)<br>82 (2C)<br>75 (5C)<br>61 (10C)<br>38 (20C)] |         | 2017/[S38] |
| <b>NTP@C nanocrystals/graphene sheets (rGO-NTP@C)</b>                                                                                                          | hydrothermal, calcination<br>1 M NaClO <sub>4</sub> in EC/DEC                                            | 0.1C                 | 40              | 1.5-3.0                        | 127                         |                |                                  | 129@0.1C                          | 125 (0.5)<br>120 (1C)<br>112 (2C)<br>99 (5C)<br>81 (10C)                                                                                                                  |         | 2017/[S39] |
| <b>MXene@NTP-C nanohybrid</b>                                                                                                                                  | solvothermal, calcination<br>(together with phenolic resin)<br>1 M NaClO <sub>4</sub> in EC/DEC (5% FEC) | 100<br>(1000/5000)   | 100<br>(2k/10k) | 0.1-3.0                        | 197<br>(143/109)            | ~100           |                                  |                                   | 208 (100)<br>198 (200)<br>182 (500)<br>166 (1000)<br>142 (2000)<br>113 (5000)<br>102 (10000)                                                                              | 0.8-1.0 | 2018/[S40] |
| <b>Hierarchical layered NTP/Mxene</b>                                                                                                                          | solvothermal, calcination<br>1 M NaClO <sub>4</sub> in EC/DEC                                            | 200/2000             | 500/200<br>0    | 0.01-3.0                       | 121/~62                     |                | 76.3                             | 198/151                           | 145 (200)<br>67 (2000)                                                                                                                                                    | ~1.0    | 2019/[S41] |
| <b>Flexible and binder-free NaTi<sub>2</sub>(PO<sub>4</sub>)<sub>3</sub>/graphene film electrode [full cell with cathode Na<sub>0.44</sub>MnO<sub>2</sub>]</b> | hydrothermal, annealing, vacuum drying (glass culture dish)                                              | 100/500              | 100/100<br>0    | 1.0-3.0<br>[2.0-4.0]           | 121/~90                     |                | 86<br>[82.3<br>%<br>ful<br>cell] | 137/118@100 mA<br>g <sup>-1</sup> | 137 (100)<br>108 (300)<br>99 (500)<br>93 (1000)                                                                                                                           |         | 2018/[S42] |

## Nano-Micro Letters

|                                                                                                                                                                |                                                                                                                       |            |                       |                      |                 |                      |           |                                                                    |                                                                                                          |     |            |
|----------------------------------------------------------------------------------------------------------------------------------------------------------------|-----------------------------------------------------------------------------------------------------------------------|------------|-----------------------|----------------------|-----------------|----------------------|-----------|--------------------------------------------------------------------|----------------------------------------------------------------------------------------------------------|-----|------------|
|                                                                                                                                                                | 1 M NaClO <sub>4</sub> in EC/DMC (5% FEC)                                                                             |            |                       |                      |                 |                      |           |                                                                    |                                                                                                          |     |            |
| <b>Free-standing 3D mesoporous NTP/rGO nanocomposite [full cell with cathode Na<sub>3</sub>V<sub>2</sub>(PO<sub>4</sub>)<sub>3</sub>]</b>                      | electrostatic self-assembly, freeze-drying, mechanical pressing, thermal treatment<br>1 M NaClO <sub>4</sub> in EC/PC | 1C/5C [1C] | 200/100<br>0<br>[100] | 1.5-3.0<br>[0.4-2.0] | 101/~68<br>[58] | 99@5<br>C<br>[99@1C] | 98.8      | 114/113@1C<br>[59@1C]                                              | 122 (0.5C)<br>114 (1C)<br>106 (2C)<br>94 (5C)<br>85 (10C)<br>76 (20C)<br>68 (30C)<br>52 (50C)<br>[58@1C] |     | 2018/[S43] |
| NTP/C composite (PVP derived C) [full cell NaTi <sub>2</sub> (PO <sub>4</sub> ) <sub>3</sub> /Na <sub>3</sub> V <sub>2</sub> (PO <sub>4</sub> ) <sub>3</sub> ] | sol-gel, sintering<br>1 M NaPF <sub>6</sub> in PC (2% FEC)                                                            | 50C [20C]  | 1000 [5000]           | 1.4-3.0 [0.5-1.5]    | ~82 [80]        | ~100 [~100]          | 98.3 [95] | 102/100@0.5C<br>[107@0.5C]<br>[based on NVP; Cu current collector] | [107@0.5C]<br>99@5C<br>85@20C]                                                                           | 3.5 | 2018/[S44] |
| CNTs-NTP@C particles composite                                                                                                                                 | sol-gel, annealing<br>1 M NaClO <sub>4</sub> in EC/PC                                                                 | 2C         | 200                   |                      | 113             |                      | 97.3      | 128/125@0.2C                                                       | 125 (0.5C)<br>122 (1C)<br>116 (2C)<br>106 (5C)<br>94 (10C)                                               | 2.7 | 2018/[S45] |
| <b>Self-supported mesoporous NTP nanocrystals/MWCNTs film</b>                                                                                                  | electrostatic assembling, vacuum filtration, annealing<br>1 M NaClO <sub>4</sub> in EC/PC                             | 1C/10C     | 200/300<br>0          | 1.5-3.0              | 123/100         | 99                   | 99        | 141/140                                                            | 133 (1C)<br>127 (2C)<br>118 (5C)<br>105 (10C)<br>91 (20C)<br>81 (30C)<br>64 (50C)                        |     | 2018/[S46] |
| <b>Flexible mesoporous NTP/rGO-CNTs</b>                                                                                                                        | solvothermal, hetero-assembly, vacuum filtration, annealing<br>1 M NaClO <sub>4</sub> in EC/PC                        | 1C (10C)   | 200 (5000)            | 1.5-3.0              | 126 (88)        | ~99 (98)             | 90        | 146/132                                                            | 132 (0.5C)<br>128 (1C)<br>123 (2C)<br>116 (5C)<br>107 (10C)<br>90 (20C)<br>73 (30C)                      |     | 2017/[S47] |
| <b>NTP powder</b>                                                                                                                                              | ceramic electrolyte                                                                                                   | 100        | 50                    | 1.5-2.5              | ~100            | 100                  | 91        | 133/121                                                            | 130 (0.1C)<br>110 (0.2C)<br>60 (0.5C)                                                                    | 0.4 | 2016/[S48] |
| <b>All-solid-state SIBs (NTP, carbon black)</b>                                                                                                                | ceramic NASICON electrolyte (performance at 65 °C)                                                                    | 0.2C       | 70                    | 1.5-2.8              | 102             | 99.7                 |           |                                                                    | 110 (0.2C)<br>94 (0.5C)<br>75 (1C)                                                                       | ~2  | 2017/[S49] |



**Table S2** Summary of the Na-storage performance of typical NaTi<sub>2</sub>(PO<sub>4</sub>)<sub>3</sub> (NTP) in aqueous electrolytes

| Type of materials                                                                                                                                    | Methods                                                                                                                                                                                            | Current density (mA g <sup>-1</sup> ) | Cycle number | Cut-off voltage (V) | Specific capacity (mAh g <sup>-1</sup> ) | CE (%)         | ICE (%)    | Initial capacity Discharge/Charge | Rate capacity/ Current density (mAh g <sup>-1</sup> ) | Mass loading (mg cm <sup>-2</sup> ) | Year/Refs. |
|------------------------------------------------------------------------------------------------------------------------------------------------------|----------------------------------------------------------------------------------------------------------------------------------------------------------------------------------------------------|---------------------------------------|--------------|---------------------|------------------------------------------|----------------|------------|-----------------------------------|-------------------------------------------------------|-------------------------------------|------------|
| <b>NaTi<sub>2</sub>(PO<sub>4</sub>)<sub>3</sub> powder [NTP//Zn] [Ag/AgCl reference electrode]</b>                                                   | Pechini method<br>1 M Na <sub>2</sub> SO <sub>4</sub>                                                                                                                                              | 2.0 mA cm <sup>-2</sup>               | 30           | -0.4 to -0.9        | ~70                                      | ~100           |            | 123                               |                                                       |                                     | 2011/[S50] |
| <b>NTP/C [NTP/graphite] (Ag/AgCl reference electrode)</b>                                                                                            | Pechini method, pyrolysis (carbon source: citric acid) [ball-milling, annealing]<br>1 M Na <sub>2</sub> SO <sub>4</sub>                                                                            | 2C                                    | 50           | -0.9 to -0.3        | 117 [80]                                 |                |            | 129@2C [118@2C]                   | 128 (2C)<br>66 (20C)<br>[100 (2C)<br>34 (20C)]        |                                     | 2016/[S51] |
| <b>NTP@C (Ag/AgCl reference electrode)</b>                                                                                                           | sol-gel, calcination, thermal decomposition vapor deposition (TVD), heat-treatment<br>1 M Na <sub>2</sub> SO <sub>4</sub> { 1 M Li <sub>2</sub> SO <sub>4</sub> /Na <sub>2</sub> SO <sub>4</sub> } | 200                                   | 50           |                     | ~80 {~71}                                | ~98            |            |                                   |                                                       | ~3                                  | 2016/[S52] |
| <b>NTP/C-U nanocomposites</b> (NPs size 20-40 nm, C shell thickness ~4nm, C content 3.82%) [full cell NTP/C-U//Na <sub>4</sub> Fe(CN) <sub>6</sub> ] | solvothermal (urea), in-situ carbon coating (calcination)<br>1 M Na <sub>2</sub> SO <sub>4</sub>                                                                                                   | 1C [1C]                               | 300 [500]    | [0.0-2.0]           | 79 [~71]                                 | >98            |            | 84                                | [84@0.5C<br>70@20C]                                   | 2-3                                 | 2018/[S13] |
| <b>Carbon-coated NTP nanoparticles</b> (~100 nm) [NTP@C//Na <sub>0.44</sub> MnO <sub>2</sub> ]                                                       | hydrothermal, calcination<br>1 M Na <sub>2</sub> SO <sub>4</sub>                                                                                                                                   | 1C                                    | 300          | [0.7-1.3]           | ~74                                      | [>99. 5% @ 1C] | [~92@0.2C] | [131/121@0.2C] [0.1-1.3 V]        | [121 (0.2C)<br>114 (0.5C)<br>103 (2C)<br>68 (5C)]     | 42/60                               | 2016/[S53] |
| <b>Polypyrrole coated NTP particles</b> (NTP@PPy)                                                                                                    | solution polymerization<br>1 M Na <sub>2</sub> SO <sub>4</sub>                                                                                                                                     | 0.2C                                  | 50           |                     | 39                                       |                | 65         | 104/68                            |                                                       |                                     | 2015/[S54] |
| <b>NTP@C/Ag particles</b> (C/Ag coating layer)                                                                                                       | sol-gel, grinding, calcination, sintering                                                                                                                                                          | 2C/5C                                 | 100/400      |                     | 108/70                                   | >95            |            | 127@2C<br>98@5C                   | 128 (1C)<br>111 (2C)<br>85 (5C)<br>65 (10C)           |                                     | 2018/[S55] |

## Nano-Micro Letters

|                                                                                                                            |                                                                                                                            |            |              |                           |          |             |       |                       |                                                                                           |                 |            |
|----------------------------------------------------------------------------------------------------------------------------|----------------------------------------------------------------------------------------------------------------------------|------------|--------------|---------------------------|----------|-------------|-------|-----------------------|-------------------------------------------------------------------------------------------|-----------------|------------|
| <b>NTP/C (carbon black, expanded graphite) [NTP/C//activated carbon] (Ag/AgCl reference electrode)</b>                     | 1 M Na <sub>2</sub> SO <sub>4</sub><br>solid-state method (ball-milling, sintering)<br>1 M Na <sub>2</sub> SO <sub>4</sub> | 2C [2C]    | 100 [500]    |                           | 78 [62]  | ~100 [~100] | 89@1C | 110/98@1C             | 98 (1C)<br>86 (2C)<br>67 (5C)<br>52 (10C)<br>[100 (1C)<br>90 (2C)<br>67 (5C)<br>55 (10C)] | ~5              | 2018/[S56] |
| <b>NTP/CNTs-graphite (Hg/Hg2SO4 reference electrode) [full cell NTP/Na<sub>0.44</sub>MnO<sub>2</sub>]</b>                  | ball-milling, sintering<br>1 M Na <sub>2</sub> SO <sub>4</sub>                                                             | 1C         | 100          | 0.1-1.4                   | 82       | >99.7       |       | 130@0.1C              | 75 (2C)                                                                                   | 6.4             | 2014/[S57] |
| <b>NTP-C// Na<sub>0.44</sub>MnO<sub>2</sub> [Hg/Hg2SO4 reference electrode]</b>                                            | rapid microwave-assisted method, ball milling (graphite)<br>1 M Na <sub>2</sub> SO <sub>4</sub>                            | 15.7       | 20           | -1.8 to -0.5 V [1.25-0.6] | 56       |             |       | 72 [85]               |                                                                                           | 30              | 2013/[S58] |
| <b>Wafer-like 3D porous NTP/C composite (Ag/AgCl reference electrode) [full cell NTP/Na<sub>0.44</sub>MnO<sub>2</sub>]</b> | self-assembly synthesis, annealing<br>1 M Na <sub>2</sub> SO <sub>4</sub>                                                  | 2C         | 300          |                           | 92       | ~100        | 75@2C | ~130/119@1C<br>114@2C | 63 (50C)<br>[114@1C]                                                                      |                 | 2015/[S59] |
| <b>Frogspawn-like hierarchical porous NTP/C array (core-shell structure)</b>                                               | template (hollow carbon sphere), impregnation, annealing                                                                   | 1C/20C     | 400/2000     |                           | ~113/~87 | ~100        |       | 127@1C                |                                                                                           | 2-3             | 2015/[S60] |
| <b>NTP/graphene nanocomposite [calomel reference electrode (SCE)]</b>                                                      | solvothetical, calcination<br>1 M Na <sub>2</sub> SO <sub>4</sub>                                                          | 2C         | 100          | -1.0 to -0.5              | 100      | ~90         |       | 104                   | 110 (2C)<br>85 (5C)<br>65 (10C)<br>40 (20C)                                               |                 | 2014/[S61] |
| <b>NTP/graphene composite (Ag/AgCl reference electrode)</b>                                                                | sol-gel, post heat-treatment<br>1 M Na <sub>2</sub> SO <sub>4</sub>                                                        | 5C/10C/20C | 400/100/2000 | -1.0 to -0.5              | 70/60/46 |             |       |                       | 129 (1C)<br>125 (2C)<br>100 (5C)<br>88 (10C)<br>64 (20C)<br>56 (40C)                      | 2-4             | 2014/[S31] |
| <b>NaTi<sub>2</sub>(PO<sub>4</sub>)<sub>3</sub>/Na<sub>0.44</sub>MnO<sub>2</sub> (NTP-C nanoparticles) [full cell]</b>     | ball-milling, calcination                                                                                                  | 25C        | 450          | 0.5-1.4                   | ~55      |             |       | ~100@9C               | ~105@3C<br>~100@15C<br>(0.1-1.4 V)                                                        | up to 17.6/43.7 | 2013/[S62] |

## Nano-Micro Letters

|                                                                                                                                          |                                                                                                     |                       |                        |           |                   |                                                                                                                                       |                                                 |                                                                                    |       |  |            |
|------------------------------------------------------------------------------------------------------------------------------------------|-----------------------------------------------------------------------------------------------------|-----------------------|------------------------|-----------|-------------------|---------------------------------------------------------------------------------------------------------------------------------------|-------------------------------------------------|------------------------------------------------------------------------------------|-------|--|------------|
|                                                                                                                                          | (pyrolysis, glucose)<br>1 M Na <sub>2</sub> SO <sub>4</sub> in DI water                             |                       |                        |           |                   |                                                                                                                                       |                                                 |                                                                                    |       |  |            |
| <b>NaTi<sub>2</sub>(PO<sub>4</sub>)<sub>3</sub>/Na<sub>3</sub>V<sub>2</sub>(PO<sub>4</sub>)<sub>3</sub> (carbon-coated NTP//NVP)</b>     | solid state method (ball-milling, sintering, heat treatment)<br>1 M Na <sub>2</sub> SO <sub>4</sub> | 10 A g <sup>-1</sup>  | 50                     | 0.5-1.6   | ~25               | 76                                                                                                                                    | 71@2 A g <sup>-1</sup><br>[0.5-1.5 V]           | [71@5C<br>58@10C]                                                                  |       |  | 2016/[S63] |
| <b>TiN modified NaTi<sub>2</sub>(PO<sub>4</sub>)<sub>3</sub> particles (NTP@TiN)</b>                                                     | solvothermal, calcination (NH <sub>3</sub> ; nitriding)<br>1 M Na <sub>2</sub> SO <sub>4</sub>      | 2C                    | 100                    |           | 92                | 89 74                                                                                                                                 | 132                                             |                                                                                    | 5     |  | 2018/[S64] |
| <b>NTP-C particles NaTi<sub>2</sub>(PO<sub>4</sub>)<sub>3</sub>/Na<sub>2</sub>NiFe(CN)<sub>6</sub> [full cell NTP//Na<sub>2</sub>PB]</b> | stoichiometric, solid-state reaction<br>1 M Na <sub>2</sub> SO <sub>4</sub>                         | 5C<br>[5C]            | 100<br>[250]           | [1.6-0.2] | 95<br>[79]        | ~100 85                                                                                                                               | 101@5C                                          |                                                                                    | ~10   |  | 2013/[S65] |
| <b>NTP/C NPs composite NaTi<sub>2</sub>(PO<sub>4</sub>)<sub>3</sub>/NaMnO<sub>2</sub> [full cell]</b>                                    | 2 M CH <sub>3</sub> COONa aqueous solution                                                          | 5C<br>[5C]            | 500<br>[500]           | [1.8-0.5] | 86<br>[28]        | ~100                                                                                                                                  | 127@1C<br>117@5C<br>[33@1C<br>23@10C<br>20@20C] | 100 (20C)                                                                          | 2-2.5 |  | 2015/[S66] |
| <b>NTP-C particles NaTi<sub>2</sub>(PO<sub>4</sub>)<sub>3</sub>/Na<sub>2</sub>CuFe(CN)<sub>6</sub> [full cell NTP//NaCuHCF]</b>          | stoichiometric, solid-state reaction<br>1 M Na <sub>2</sub> SO <sub>4</sub>                         | [2C/10C]              | [100/100<br>0]         | [1.8-0.0] | [97/74]           | [75.6]                                                                                                                                | [104@2C]                                        | [104 (2C)<br>93 (5C)<br>86 (10C)<br>83 (20C)<br>70 (50C)<br>60 (80C)<br>50 (100C)] | ~10   |  | 2014/[S67] |
| <b>NTP/MWCNTs composite NTP/MWCNTs//Na<sub>0.44</sub>MnO<sub>2</sub></b>                                                                 | solvothermal,<br>1 M Na <sub>2</sub> SO <sub>4</sub>                                                | 2C<br>[2C0]           | 200<br>[10/60/24<br>0] | [1.4-0.2] | 92<br>[128/60/50] | 84                                                                                                                                    | 122/103                                         | 120 (2C)<br>90 (5C)<br>80 (10C)<br>60 (20C)<br>[68 (5C)<br>45 (10C)<br>23 (20C)]   |       |  | 2014/[S68] |
| <b>NTP-C (acetylene black) [NTP-C//Na<sub>2</sub>FeP<sub>2</sub>O<sub>7</sub>]</b>                                                       | ball-milling, carbothermal treatment                                                                | 2 mA cm <sup>-2</sup> | 30                     | 1.4-0     | [38<br>3<br>42]   | [95 (2M Na <sub>2</sub> SO <sub>4</sub> )<br>82 (4 M NaNO <sub>3</sub> )<br>96 (4M NaClO <sub>4</sub> )<br>at 2 mA cm <sup>-2</sup> ] |                                                 |                                                                                    |       |  | 2016/[S4]  |

## Supplementary References

- [S1] C. Wu, P. Kopold, Y.-L. Ding, P.A. van Aken, J. Maier, Y. Yu, Synthesizing porous  $\text{NaTi}_2(\text{PO}_4)_3$  nanoparticles embedded in 3D graphene networks for high-rate and long cycle-life sodium electrodes. *ACS Nano* **9**, 6610-6618 (2015). <https://doi.org/10.1021/acsnano.5b02787>
- [S2] Y. Fang, L. Xiao, J. Qian, Y. Cao, X. Ai, Y. Huang, H. Yang, 3D graphene decorated  $\text{NaTi}_2(\text{PO}_4)_3$  microspheres as a superior high-rate and ultracycle-stable anode material for sodium ion batteries. *Adv. Energy Mater.* **6**, 1502197 (2016). <https://doi.org/10.1002/aenm.201502197>
- [S3] G. Yang, H. Song, M. Wu, C. Wang, Porous  $\text{NaTi}_2(\text{PO}_4)_3$  nanocubes: a high-rate nonaqueous sodium anode material with more than 10 000 cycle life. *J. Mater. Chem. A* **3**, 18718-18726 (2015). <https://doi.org/10.1039/C5TA04491J>
- [S4] K. Nakamoto, Y. Kano, A. Kitajou, S. Okada, Electrolyte dependence of the performance of a  $\text{Na}_2\text{FeP}_2\text{O}_7//\text{NaTi}_2(\text{PO}_4)_3$  rechargeable aqueous sodium-ion battery. *J. Power Sources* **327**, 327-332 (2016). <https://doi.org/10.1016/j.jpowsour.2016.07.052>
- [S5] X. Yang, K. Wang, X. Wang, G. Chang, S. Sun, Carbon-coated  $\text{NaTi}_2(\text{PO}_4)_3$  composite: A promising anode material for sodium-ion batteries with superior Na-storage performance. *Solid State Ionics* **314**, 61-65(2018). <https://doi.org/10.1016/j.ssi.2017.11.016>
- [S6] D. Cai, B. Qu, H. Zhan, Porous  $\text{NaTi}_2(\text{PO}_4)_3$  nanoparticles coated with a thin carbon layer for sodium-ion batteries with enhanced rate and cycling performance. *Mater. Lett.* **218**, 14-17 (2018). <https://doi.org/10.1016/j.matlet.2018.01.131>
- [S7] D. Xu, P. Wang, R. Yang, Nitrogen-doped carbon decorated  $\text{NaTi}_2(\text{PO}_4)_3$  composite as an anode for sodium-ion batteries with outstanding electrochemical performance. *Ceram. Int.* **44**, 7159-7164 (2018). <https://doi.org/10.1016/j.ceramint.2018.01.160>
- [S8] Z. Huang, L. Liu, L. Yi, W. Xiao, M. Li et al., Facile solvothermal synthesis of  $\text{NaTi}_2(\text{PO}_4)_3/\text{C}$  porous plates as electrode materials for high-performance sodium ion batteries. *J. Power Sources* **325**, 474-481(2016). <https://doi.org/10.1016/j.jpowsour.2016.06.066>
- [S9] Y. Jiang, J. Shi, M. Wang, L. Zeng, L. Gu, Y. Yu, Highly reversible and ultrafast sodium storage in  $\text{NaTi}_2(\text{PO}_4)_3$  nanoparticles embedded in nanocarbon networks. *ACS Appl. Mater. Interfaces* **8**, 689-695 (2016). <https://doi.org/10.1021/acsmi.5b09811>
- [S10] Y. Niu, M. Xu, C. Guo, C.M. Li, Pyro-synthesis of a nanostructured  $\text{NaTi}_2(\text{PO}_4)_3/\text{C}$  with a novel lower voltage plateau for rechargeable sodium-ion batteries. *J. Colloid Interf. Sci.* **474**, 88-92(2016). <https://doi.org/10.1016/j.jcis.2016.04.021>

- [S11] D. Wang, Q. Liu, C. Chen, M. Li, X. Meng et al., NASICON-structured  $\text{NaTi}_2(\text{PO}_4)_3/\text{C}$  nanocomposite as the low operation-voltage anode material for high-performance sodium ion batteries. *ACS Appl. Mater. Interfaces* **8**, 2238-2246(2016). <https://doi.org/10.1021/acsami.5b11003>
- [S12] J. Peng, J. Wang, H. Yi, W. Hu, Y. Yu et al., A dual-insertion type sodium-ion full cell based on high-quality ternary-metal prussian blue analogs. *Adv. Energy Mater.* **8**, 1702856 (2018). <https://doi.org/10.1002/aenm.201702856>
- [S13] L. Fu, X. Xue, Y. Tang, D. Sun, H. Xie, H. Wang, Size controlling and surface engineering enable  $\text{NaTi}_2(\text{PO}_4)_3/\text{C}$  outstanding sodium storage properties. *Electrochim. Acta* **289**, 21-28(2018). <https://doi.org/10.1016/j.electacta.2018.09.024>
- [S14] Y. Niu, M. Xu, Y. Zhang, J. Han, Y. Wang, C.M. Li, Detailed investigation of a  $\text{NaTi}_2(\text{PO}_4)_3$  anode prepared by pyro-synthesis for Na-ion batteries. *RSC Adv.* **6**, 45605-45611(2016). <https://doi.org/10.1039/C6RA06533C>
- [S15] H. Liu, H. Zhang, C. Su, X. Li, Y. Guo, Three-dimensional  $\text{NaTi}_2(\text{PO}_4)_3/\text{C}$  microsphere as a high-performance anode material for advanced sodium-ion batteries. *Solid State Ionics* **322**, 79-84 (2018). <https://doi.org/10.1016/j.ssi.2018.05.005>
- [S16] L. Zhang, X. Wang, W. Deng, X. Zang, C. Liu et al., An open holey structure enhanced rate capability in a  $\text{NaTi}_2(\text{PO}_4)_3/\text{C}$  nanocomposite and provided ultralong-life sodium-ion storage. *Nanoscale* **10**, 958-963 (2018). <https://doi.org/10.1039/C7NR07000D>
- [S17] Q. Hu, M. Yu, J. Liao, Z. Wen, C. Chen, Porous carbon-coated  $\text{NaTi}_2(\text{PO}_4)_3$  with superior rate and low-temperature properties. *J. Mater. Chem. A* **6**, 2365-2370 (2018). <https://doi.org/10.1039/C7TA10207K>
- [S18] M. Li, L. Liu, P. Wang, J. Li, Q. Leng, G. Cao, Highly reversible sodium-ion storage in  $\text{NaTi}_2(\text{PO}_4)_3/\text{C}$  composite nanofibers. *Electrochim. Acta* **252**, 523-531 (2017). <https://doi.org/10.1016/j.electacta.2017.09.020>
- [S19] P. Wei, Y. Liu, Z. Wang, Y. Huang, Y. Jin et al., Porous  $\text{NaTi}_2(\text{PO}_4)_3/\text{C}$  hierarchical nanofibers for ultrafast electrochemical energy storage. *ACS Appl. Mater. Interfaces* **10**, 27039-27046 (2018). <https://doi.org/10.1021/acsami.8b08415>
- [S20] S. Yu, Y. Wan, C. Shang, Z. Wang, L. Zhou, J. Zou, H. Cheng, Z. Lu, Ultrafine  $\text{NaTi}_2(\text{PO}_4)_3$  nanoparticles encapsulated in N-CNFs as ultra-stable electrode for sodium storage. *Front. Chem.* **6**, 270 (2018). <https://doi.org/10.3389/fchem.2018.00270>
- [S21] L. Wang, B. Wang, G. Liu, T. Liu, T. Gao, D. Wang, Carbon nanotube decorated  $\text{NaTi}_2(\text{PO}_4)_3/\text{C}$  nanocomposite for a high-rate and low-temperature sodium-ion battery anode. *RSC Adv.* **6**, 70277-70283 (2016). <https://doi.org/10.1039/C6RA11042H>

- [S22] G.B. Xu, L.W. Yang, X.L. Wei, J.W. Ding, J.X. Zhong, P.K. Chu, Hierarchical porous nanocomposite architectures from multi-wall carbon nanotube threaded mesoporous  $\text{NaTi}_2(\text{PO}_4)_3$  nanocrystals for high-performance sodium electrodes. *J. Power Sources* **327**, 580-590 (2016). <https://doi.org/10.1016/j.jpowsour.2016.07.089>
- [S23] M. Bian, L. Tian, Design and synthesis of three-dimensional  $\text{NaTi}_2(\text{PO}_4)_3$ @CNT microspheres as advanced anode materials for rechargeable sodium-ion batteries. *Ceram. Int.* **43**, 9543-9546 (2017). <https://doi.org/10.1016/j.ceramint.2017.04.029>
- [S24] Z. Wang, J. Liang, K. Fan, X. Liu, C. Wang, J. Ma, Porous  $\text{NaTi}_2(\text{PO}_4)_3$  nanocubes anchored on porous carbon nanosheets for high performance sodium-ion batteries. *Front. Chem.* **6**, (2018). <https://doi.org/10.3389/fchem.2018.00396>
- [S25] G. Pang, P. Nie, C. Yuan, L. Shen, X. Zhang, H. Li, C. Zhang, Mesoporous  $\text{NaTi}_2(\text{PO}_4)_3$ /CMK-3 nanohybrid as anode for long-life Na-ion batteries. *J. Mater. Chem. A* **2**, 20659-20666 (2014). <https://doi.org/10.1039/C4TA04732J>
- [S26] H. Liu, Y. Liu, 1D mesoporous  $\text{NaTi}_2(\text{PO}_4)_3$ /carbon nanofiber: The promising anode material for sodium-ion batteries. *Ceram. Int.* **44**, 5813-5816 (2018). <https://doi.org/10.1016/j.ceramint.2017.12.147>
- [S27] J. Liang, K. Fan, Z. Wei, X. Gao, W. Song, J. Ma, Porous  $\text{NaTi}_2(\text{PO}_4)_3$ @C nanocubes as improved anode for sodium-ion batteries. *Mater. Res. Bull.* **99**, 343-348 (2018). <https://doi.org/10.1016/j.materresbull.2017.11.030>
- [S28] Y. Jiang, L. Zeng, J. Wang, W. Li, F. Pan, Y. Yu, A carbon coated NASICON structure material embedded in porous carbon enabling superior sodium storage performance:  $\text{NaTi}_2(\text{PO}_4)_3$  as an example. *Nanoscale* **7**, 14723-14729(2015). <https://doi.org/10.1039/C5NR03978A>
- [S29] J. Yang, H. Wang, P. Hu, J. Qi, L. Guo, L. Wang, A high-rate and ultralong-life sodium-ion battery based on  $\text{NaTi}_2(\text{PO}_4)_3$  nanocubes with synergistic coating of carbon and rutile  $\text{TiO}_2$ . *Small* **11**, 3744-3749 (2015). <https://doi.org/10.1002/sml.201500144>
- [S30] C. Xu, Y. Xu, C. Tang, Q. Wei, J. Meng, L. Huang, L. Zhou, G. Zhang, L. He, L. Mai, Carbon-coated hierarchical  $\text{NaTi}_2(\text{PO}_4)_3$  mesoporous microflowers with superior sodium storage performance. *Nano Energy* **28**, 224-231(2016). <https://doi.org/10.1016/j.nanoen.2016.08.026>
- [S31] X. Li, X. Zhu, J. Liang, Z. Hou, Y. Wang, N. Lin, Y. Zhu, Y. Qian, Graphene-supported  $\text{NaTi}_2(\text{PO}_4)_3$  as a high rate anode material for aqueous sodium ion batteries. *J. Electrochem. Soc.* **161**, A1181-A1187 (2014). <https://doi.org/10.1149/2.0081409jes>
- [S32] J.S. Ko, C.S. Choi, B. Dunn, J.W. Long, Electrochemical characterization of Na-ion charge-storage properties for nanostructured  $\text{NaTi}_2(\text{PO}_4)_3$  as a function of crystalline order. *J. Electrochem. Soc.* **164**, A2124-A2130(2017). <https://doi.org/10.1149/2.1391709jes>

- [S33] M. Sun, X. Han, S. Chen, NaTi<sub>2</sub>(PO<sub>4</sub>)<sub>3</sub>@C nanoparticles embedded in 2D sulfur-doped graphene sheets as high-performance anode materials for sodium energy storage. *Electrochim. Acta* **289**,131-138 (2018). <https://doi.org/10.1016/j.electacta.2018.08.061>
- [S34] H.-K. Roh, H.-K. Kim, M.-S. Kim, D.-H. Kim, K.Y. Chung, K.C. Roh, K.-B. Kim, In situ synthesis of chemically bonded NaTi<sub>2</sub>(PO<sub>4</sub>)<sub>3</sub>/rGO 2D nanocomposite for high-rate sodium-ion batteries. *Nano Res.* **9**, 1844-1855(2016). <https://doi.org/10.1007/s12274-016-1077-y>
- [S35] J. Song, S. Park, J. Gim, V. Mathew, S. Kim, J. Jo, S. Kim, J. Kim, High rate performance of a NaTi<sub>2</sub>(PO<sub>4</sub>)<sub>3</sub>/rGO composite electrode via pyro synthesis for sodium ion batteries. *J. Mater. Chem. A* **4**,7815-7822(2016). <https://doi.org/10.1039/C6TA02720B>
- [S36] Y. Hu, X. Ma, P. Guo, F. Jaeger, Z. Wang, Design of NaTi<sub>2</sub>(PO<sub>4</sub>)<sub>3</sub> nanocrystals embedded in N-doped graphene sheets for sodium-ion battery anode with superior electrochemical performance. *Ceram. Int.* **43**, 12338-12342(2017). <https://doi.org/10.1016/j.ceramint.2017.06.098>
- [S37] S. Ye, Z. Li, T. Song, D. Cheng, Q. Xu, H. Liu, Y. Wang, Self-generated hollow NaTi<sub>2</sub>(PO<sub>4</sub>)<sub>3</sub> nanocubes decorated with graphene as a large capacity and long lifetime anode for sodium-ion batteries. *RSC Adv.* **7**, 56743-56751(2017). <https://doi.org/10.1039/C7RA12291H>
- [S38] X. Jiang, Z. Zeng, L. Xiao, X. Ai, H. Yang, Y. Cao, An all-phosphate and zero-strain sodium-ion battery based on Na<sub>3</sub>V<sub>2</sub>(PO<sub>4</sub>)<sub>3</sub> Cathode, NaTi<sub>2</sub>(PO<sub>4</sub>)<sub>3</sub> anode, and trimethyl phosphate electrolyte with intrinsic safety and long lifespan. *ACS Appl. Mater. Interfaces* **9**, 43733-43738 (2017). <https://doi.org/10.1021/acsami.7b14946>
- [S39] Y. Zuo, L. Chen, Z. Zuo, Y. Huang, X. Liu, Rational construction of NaTi<sub>2</sub>(PO<sub>4</sub>)<sub>3</sub>@C nanocrystals embedded in graphene sheets as anode materials for Na-ion batteries. *Ceram. Int.* **43**,12915-12919(2017). <https://doi.org/10.1016/j.ceramint.2017.06.189>
- [S40] Q. Yang, T. Jiao, M. Li, Y. Li, L. Ma et al., In situ formation of NaTi<sub>2</sub>(PO<sub>4</sub>)<sub>3</sub> cubes on Ti<sub>3</sub>C<sub>2</sub> MXene for dual-mode sodium storage. *J. Mater. Chem. A* **6**, 18525-18532(2018). <https://doi.org/10.1039/C8TA06995F>
- [S41] C. Yang, X. Sun, Y.R. Zhang, Y. Liu, Q.A. Zhang, C.Z. Yuan, Facile synthesis of hierarchical NaTi<sub>2</sub>(PO<sub>4</sub>)<sub>3</sub>/Ti<sub>3</sub>C<sub>2</sub> nanocomposites with superior sodium storage performance. *Mater. Lett.* **236**, 408-411(2019). <https://doi.org/10.1016/j.matlet.2018.10.147>
- [S42] D. Guo, J. Qin, C. Zhang, M. Cao, Constructing flexible and binder-free NaTi<sub>2</sub>(PO<sub>4</sub>)<sub>3</sub> film electrode with a sandwich structure by a two-step graphene hybridizing strategy as an ultrastable anode for long-life sodium-ion batteries. *Cryst. Growth Des.* **18**, 3291-3301(2018). <https://doi.org/10.1021/acs.cgd.7b01549>

- [S43] L. Xu, G. Xu, Z. Chen, X. Wei, J. Cao, L. Yang, 3D nanocomposite architecture constructed by reduced graphene oxide, thermally-treated protein and mesoporous  $\text{NaTi}_2(\text{PO}_4)_3$  nanocrystals as free-standing electrodes for advanced sodium ion battery. *J. Mater. Sci.* **29**, 9258-9267(2018). <https://doi.org/10.1007/s10854-018-8955-x>
- [S44] H. Zhang, B. Qin, D. Buchholz, S. Passerini, High-efficiency sodium-ion battery based on NASICON electrodes with high power and long lifespan. *ACS Appl. Energy Mater.* (2018). <https://doi.org/10.1021/acsaem.8b01390>
- [S45] Z. Zhou, N. Li, C. Zhang, X. Chen, F. Xu, C. Peng, Preparation of carbon layer and carbon nanotube co-decorated  $\text{NaTi}_2(\text{PO}_4)_3$  anode and its application in sodium-ion batteries. *Solid State Ionics* **324**, 87-91 (2018). <https://doi.org/10.1016/j.ssi.2018.06.011>
- [S46] G. Xu, L. Yang, Z. Li, X. Wei, P.K. Chu, Protein-assisted assembly of mesoporous nanocrystals and carbon nanotubes for self-supporting high-performance sodium electrodes. *J. Mater. Chem. A* **5**, 2749-2758 (2017). <https://doi.org/10.1039/C6TA09673E>
- [S47] G. Xu, Z. Li, X. Wei, L. Yang, P.K. Chu, Monolithic hierarchical carbon assemblies embedded with mesoporous  $\text{NaTi}_2(\text{PO}_4)_3$  nanocrystals for flexible high-performance sodium anodes. *Electrochim. Acta* **254**, 328-336 (2017). <https://doi.org/10.1016/j.electacta.2017.09.121>
- [S48] K. Zhao, Y. Liu, S. Zhang, S. He, N. Zhang, J. Yang, Z. Zhan, A room temperature solid-state rechargeable sodium ion cell based on a ceramic Na-beta"- $\text{Al}_2\text{O}_3$  electrolyte and  $\text{NaTi}_2(\text{PO}_4)_3$  cathode. *Electrochem. Commun.* **69**, 59-63 (2016). <https://doi.org/10.1016/j.elecom.2016.06.003>
- [S49] W. Zhou, Y. Li, S. Xin, J.B. Goodenough, Rechargeable sodium all-solid-state battery. *ACS Central Sci.* **3**, 52-57 (2017). <https://doi.org/10.1021/acscentsci.6b00321>
- [S50] S.I. Park, I. Gocheva, S. Okada, J.-i. Yamaki, Electrochemical properties of  $\text{NaTi}_2(\text{PO}_4)_3$  anode for rechargeable aqueous sodium-ion batteries. *J. Electrochem. Soc.* **158**, A1067-A1070 (2011). <https://doi.org/10.1149/1.3611434>
- [S51] Y. He, Y. Hua, Y. Wu, C. Chi, Y. Shi, C. Ai,  $\text{NaTi}_2(\text{PO}_4)_3$ /carbon and  $\text{NaTi}_2(\text{PO}_4)_3$ /graphite composites as anode materials for aqueous rechargeable na-ion batteries. *Electrochemistry* **84**, 705-708 (2016). <https://doi.org/10.5796/electrochemistry.84.705>
- [S52] L. Chen, J. Liu, Z. Guo, Y. Wang, C. Wang, Y. Xia, Electrochemical profile of  $\text{LiTi}_2(\text{PO}_4)_3$  and  $\text{NaTi}_2(\text{PO}_4)_3$  in lithium, sodium or mixed ion aqueous solutions. *J. Electrochem. Soc.* **163**, A904-A910 (2016). <https://doi.org/10.1149/2.0531606jes>



- [S53] T.-F. Hung, W.-H. Lan, Y.-W. Yeh, W.-S. Chang, C.-C. Yang, J.-C. Lin, Hydrothermal synthesis of sodium titanium phosphate nanoparticles as efficient anode materials for aqueous sodium-ion batteries. *ACS Sustain. Chem. Eng.* **4**, 7074-7079 (2016). <https://doi.org/10.1021/acssuschemeng.6b01962>
- [S54] A.I. Mohamed, N.J. Sansone, B. Kuei, N.R. Washburn, J.E. Whitacre, Using polypyrrole coating to improve cycling stability of  $\text{NaTi}_2(\text{PO}_4)_3$  as an aqueous Na-ion anode. *J. Electrochem. Soc.* **162**, A2201-A2207 (2015). <https://doi.org/10.1149/2.0961510jes>
- [S55] X. Yao, Y. Luo, Y. Li, W. Li, M. Fang, M. Shui, J. Shu, Y. Ren, The investigation of  $\text{NaTi}_2(\text{PO}_4)_3@C/Ag$  as a high-performance anode material for aqueous rechargeable sodium-ion batteries. *Mater. Res. Bull.* **104**, 194-201(2018). <https://doi.org/10.1016/j.materresbull.2018.03.035>
- [S56] X. Cao, Y. Yang, Facile synthesis of  $\text{NaTi}_2(\text{PO}_4)_3$ -carbon composite through solid state method and its application in aqueous sodium ion battery. *Mater. Lett.* **231**, 183-186 (2018). <https://doi.org/10.1016/j.matlet.2018.08.020>
- [S57] W. Wu, J. Yan, A. Wise, A. Rutt, J.F. Whitacre, Using intimate carbon to enhance the performance of  $\text{NaTi}_2(\text{PO}_4)_3$  anode materials: carbon nanotubes vs graphite. *J. Electrochem. Soc.* **161**, A561-A567 (2014). <https://doi.org/10.1149/2.059404jes>
- [S58] W. Wu, A. Mohamed, J.F. Whitacre, Microwave synthesized  $\text{NaTi}_2(\text{PO}_4)_3$  as an aqueous sodium-ion negative electrode. *J. Electrochem. Soc.* **160**, A497-A504 (2013). <https://doi.org/10.1149/2.054303jes>
- [S59] B. Zhao, Q. Wang, S. Zhang, C. Deng, Self-assembled wafer-like porous  $\text{NaTi}_2(\text{PO}_4)_3$  decorated with hierarchical carbon as a high-rate anode for aqueous rechargeable sodium batteries. *J. Mater. Chem. A* **3**, 12089-12096 (2015). <https://doi.org/10.1039/C5TA02568K>
- [S60] B. Zhao, B. Lin, S. Zhang, C. Deng, A frogspawn-inspired hierarchical porous  $\text{NaTi}_2(\text{PO}_4)_3$ -C array for high-rate and long-life aqueous rechargeable sodium batteries. *Nanoscale* **7**, 18552-18560 (2015). <https://doi.org/10.1039/C5NR06505D>
- [S61] G. Pang, C. Yuan, P. Nie, B. Ding, J. Zhu, X. Zhang, Synthesis of NASICON-type structured  $\text{NaTi}_2(\text{PO}_4)_3$ -graphene nanocomposite as an anode for aqueous rechargeable Na-ion batteries. *Nanoscale* **6**, 6328-6334 (2014). <https://doi.org/10.1039/C3NR06730K>
- [S62] Z. Li, D. Young, K. Xiang, W.C. Carter, Y.-M. Chiang, Towards high power high energy aqueous sodium-ion batteries: The  $\text{NaTi}_2(\text{PO}_4)_3/\text{Na}_{0.44}\text{MnO}_2$  system. *Adv. Energy Mater.* **3**, 290-294 (2013). <https://doi.org/10.1002/aenm.201200598>
- [S63] Q. Zhang, C. Liao, T. Zhai, H. Li, A high rate 1.2V aqueous sodium-ion battery based on all NASICON structured  $\text{NaTi}_2(\text{PO}_4)_3$  and  $\text{Na}_3\text{V}_2(\text{PO}_4)_3$ . *Electrochim. Acta* **196**, 470-478 (2016). <https://doi.org/10.1016/j.electacta.2016.03.007>

- [S64] Z. Liu, Y. An, G. Pang, S. Dong, C. Xu, C. Mi, X. Zhang, TiN modified  $\text{NaTi}_2(\text{PO}_4)_3$  as an anode material for aqueous sodium ion batteries. *Chem. Eng. J.* **353**, 814-823(2018). <https://doi.org/10.1016/j.cej.2018.07.159>
- [S65] X. Wu, Y. Cao, X. Ai, J. Qian, H. Yang, A low-cost and environmentally benign aqueous rechargeable sodium-ion battery based on  $\text{NaTi}_2(\text{PO}_4)_3\text{-Na}_2\text{NiFe}(\text{CN})_6$  intercalation chemistry. *Electrochem. Commun.* **31**, 145-148(2013). <https://doi.org/10.1016/j.elecom.2013.03.013>
- [S66] Z. Hou, X. Li, J. Liang, Y. Zhu, Y. Qian, An aqueous rechargeable sodium ion battery based on a  $\text{NaMnO}_2\text{-NaTi}_2(\text{PO}_4)_3$  hybrid system for stationary energy storage. *J. Mater. Chem. A* **3**, 1400-1404 (2015). <https://doi.org/10.1039/C4TA06018K>
- [S67] X.-y. Wu, M.-y. Sun, Y.-f. Shen, J.-f. Qian, Y.-l. Cao, X.-p. Ai, H.-x. Yang, Energetic aqueous rechargeable sodium-ion battery based on  $\text{Na}_2\text{CuFe}(\text{CN})_6\text{-NaTi}_2(\text{PO}_4)_3$  intercalation chemistry. *Chemosuschem* **7**, 407-411(2014). <https://doi.org/10.1002/cssc.201301036>
- [S68] G. Pang, P. Nie, C. Yuan, L. Shen, X. Zhang, J. Zhu, B. Ding, Enhanced performance of aqueous sodium-ion batteries using electrodes based on the  $\text{NaTi}_2(\text{PO}_4)_3\text{/MWNTs-Na}_{0.44}\text{MnO}_2$  system. *Energy Technol.* **2**, 705-712 (2014). <https://doi.org/10.1002/ente.201402045>
